# Supplementary material for: Revised conformational assignments and conformational evolution of tyrosine by laser desorption supersonic jet laser spectroscopy
Source: Royal Society of Chemistry journal article supplement (doi:10.1039/c3cp43573c), 2013-01-01
Supplement: c3cp43573c.pdf [file c3cp43573c.pdf]

Table S1. Frequency differences (S-R /  $\text{cm}^{-1}$ ) of carboxy OH stretching between the phenolic OH rotamer

| Computational level | B     | X    | I     |
|---------------------|-------|------|-------|
| B3LYP/cc-pVDZ       | -0.36 | +4.1 | -0.95 |
| CAM-B3LYP/6-31+G*   | -0.87 | +4.7 | -0.40 |
| CAM-B3LYP/cc-pVDZ   | -0.28 | +4.2 | -0.66 |
| CAM-B3LYP/cc-pVTZ   | -0.44 | +3.7 | -0.18 |
